# Supplementary material for: Biofabrication and characterization of multispecies electroactive biofilms in stratified paper-based scaffolds
Source: Royal Society of Chemistry journal article supplement (doi:10.1039/d2an01059c), 2022-01-01
Supplement: d2an01059c1.pdf [file d2an01059c1.pdf]

## Supporting Information

### Biofabrication and Characterization of Multispecies Electroactive Biofilms in Stratified Paper-based Scaffolds

Anwar Elhadad<sup>1</sup> and Seokheun Choi<sup>1,2\*</sup>

<sup>1</sup>Bioelectronics & Microsystems Laboratory, Department of Electrical & Computer Engineering, State University of New York at Binghamton, Binghamton, New York, 13902, USA

<sup>2</sup>Center for Research in Advanced Sensing Technologies & Environmental Sustainability, State University of New York at Binghamton, Binghamton, New York, 13902, USA

\*Corresponding Author. Email: [sechoi@binghamton.edu](mailto:sechoi@binghamton.edu)

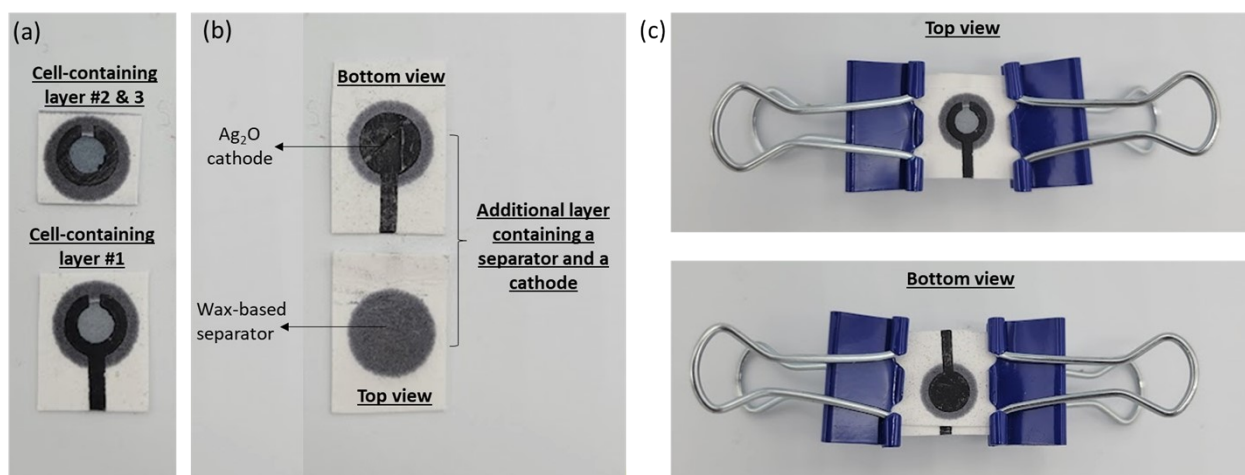

Figure S1. Pictures of individual paper layers and multi-laminate structures. (a) Individual paper layers including bacterial cells, (b) additional layer integrating a separator and a cathode, and (c) multi-laminate paper structures with the additional layer to form a MFC configuration.

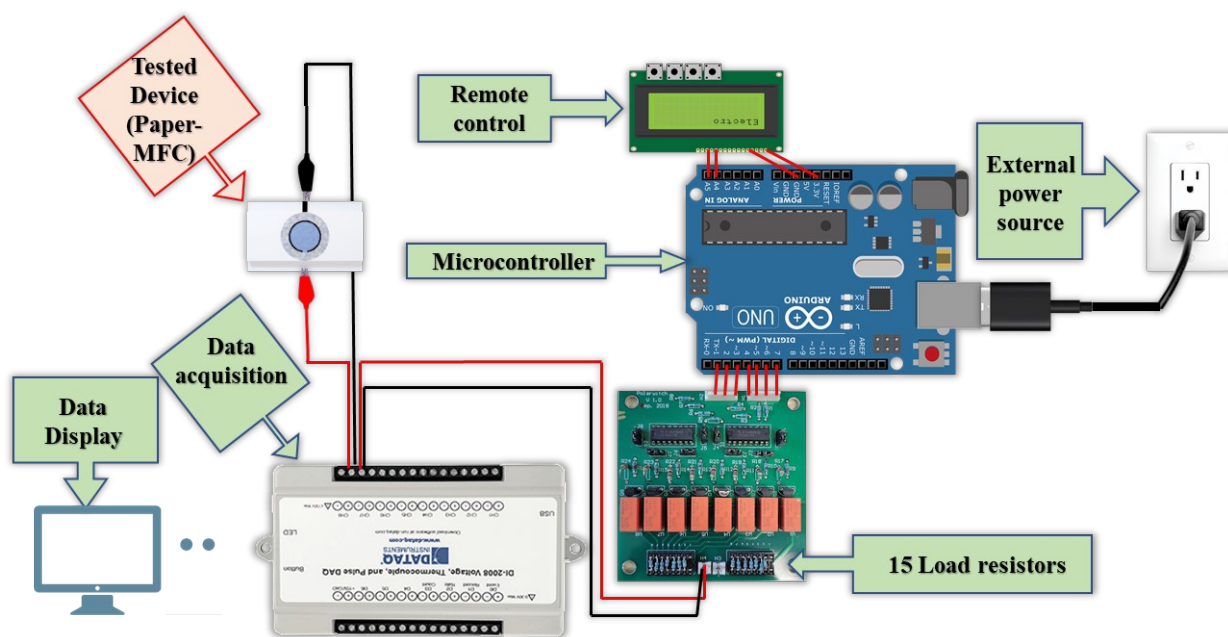

Figure S2. Test setup. The voltage differences between the bacteria-containing reservoirs (as an anode) and the cathode are measured by a data acquisition system. The polarization test modules automatically connect 15 resistors to the 3-D stacked MFC.

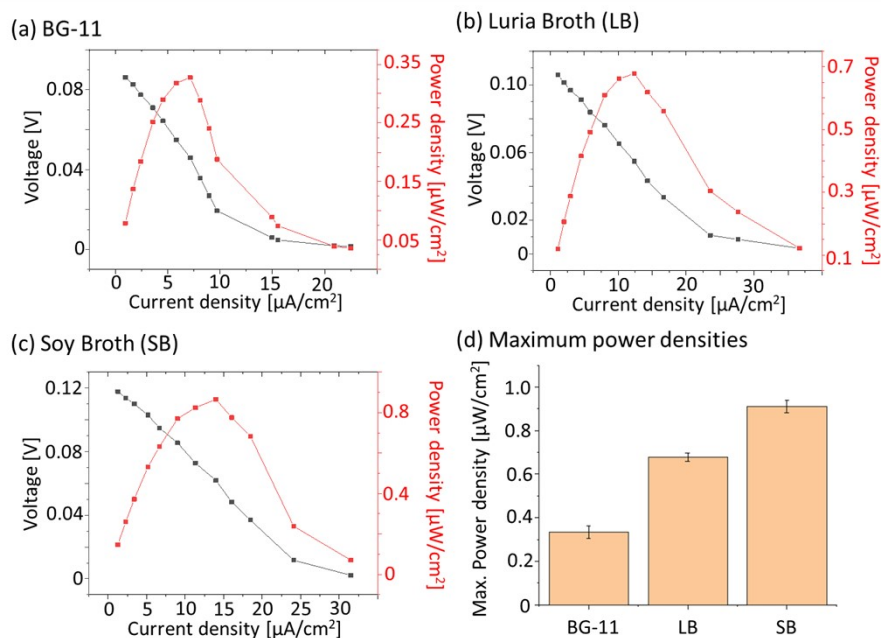

Figure S3. Control data only with media. Polarization and power curves of (a) BG-11, (b) LB, and (c) SB without bacterial cells. (d) Comparison data of the maximum power densities of BG-11, LB, and SB. The experiments are conducted in triplicates.

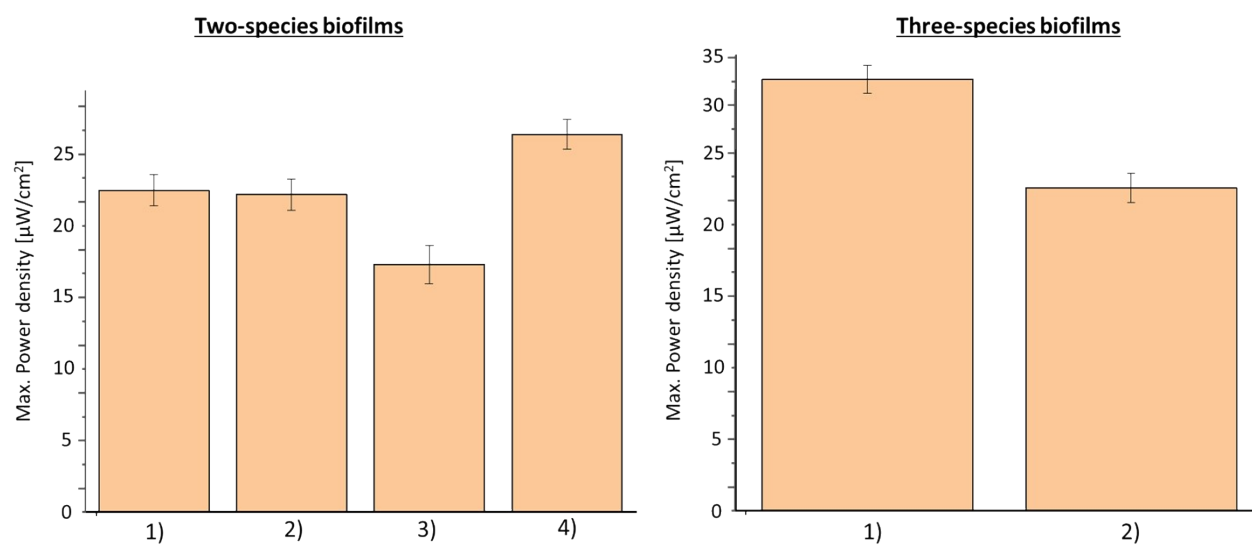

Figure S4. Comparison data of the mainum power densities of two-species biofilms and three-species biofilms. The experiments are conducted in triplicate.
